# Supplementary material for: Utility of ElastPQ point-shear wave elastography in the work-up of patients with primary sclerosing cholangitis
Source: PubMed Central journal article supplement — JHEP Rep. 2023 Aug 6;5(11):100873. doi: 10.1016/j.jhepr.2023.100873 (PMC10522908; doi:10.1016/j.jhepr.2023.100873), 2023-08-06
Supplement: mmc1.pdf [file mmc1.pdf]

# Utility of ElastPQ point-shear wave elastography in the work-up of patients with primary sclerosing cholangitis

Davide Roccarina, Francesca Saffioti, Matteo Rosselli, Aileen Marshall,  
Massimo Pinzani, Douglas Thorburn

|                   |   |
|-------------------|---|
| Table of contents |   |
| Table S1.....     | 2 |
| Table S2.....     | 3 |
| Table S3.....     | 4 |
| Table S1.....     | 6 |

LSM ElastPQ was significantly correlated with MELD (Spearman's rho 0.46,  $p < 0.001$ ), PSC Mayo risk score (Spearman's rho 0.65,  $p = 0.003$ ) and Oxford-Amsterdam score (Spearman's rho 0.57,  $p < 0.001$ ). The highest correlation coefficient for Mayo risk score was significantly better than the correlation coefficient for MELD ( $p = 0.014$ ). No statistically significant difference was found between the correlation coefficients of PSC Mayo risk and Oxford-Amsterdam scores ( $p = 0.29$ ). A positive and significant correlation was found between LSM ElastPQ and serum bilirubin (Spearman's rho 0.61,  $p < 0.001$ ), alkaline phosphatase (ALP) (Spearman's rho 0.47,  $p < 0.001$ ), ALT (Spearman's rho 0.47,  $p < 0.001$ ) and AST (Spearman's rho 0.64,  $p < 0.001$ ) levels.

There was no statistically significant difference between the correlations of ElastPQ and those of F-TE with the prognostic scores and serum markers of inflammation and cholestasis (Table S1).

Table S1. Correlation between liver elastography, prognostic scores and serum markers of inflammation and cholestasis (Spearman's rank correlation coefficient used;  $p \leq 0.05$  represents the significance level).

|                             |            | MELD   | PSC Mayo RS | Oxford-Amsterdam score | ALT    | AST    | Bilirubin | ALP    |
|-----------------------------|------------|--------|-------------|------------------------|--------|--------|-----------|--------|
| <b>F-TE</b>                 | <i>rho</i> | 0.392  | 0.649       | 0.568                  | 0.494  | 0.655  | 0.587     | 0.476  |
|                             | <i>P</i>   | <0.001 | <0.001      | <0.001                 | <0.001 | <0.001 | <0.001    | <0.001 |
| <b>ElastPQ LSM (median)</b> | <i>rho</i> | 0.455  | 0.651       | 0.574                  | 0.470  | 0.643  | 0.608     | 0.468  |
|                             | <i>P</i>   | <0.001 | 0.003       | <0.001                 | <0.001 | <0.001 | <0.001    | <0.001 |
| <b>ElastPQ SSM (median)</b> | <i>rho</i> | 0.295  | 0.364       | 0.451                  | 0.193  | 0.328  | 0.237     | 0.228  |
|                             | <i>P</i>   | 0.002  | <0.001      | <0.001                 | 0.044  | <0.001 | 0.013     | 0.017  |

ALT, alanine aminotransferase; AST, aspartate aminotransferase; ALP, alkaline phosphatase; MELD, model of end-stage liver disease; PSC, primary sclerosing cholangitis; RS, risk score; F-TE, liver transient elastography performed with FibroScan; LSM, liver stiffness measurement; SSM, spleen stiffness measurement.

A difference of LSM  $\geq 2$  kPa between F-TE and ElastPQ was found in 33 patient (22%). On the univariate analysis, variables significantly associated with a LSM difference  $\geq 2$  kPa were the Mayo risk score, total bilirubin, ALT, AST, ALP, platelet count and the presence of cirrhosis. On the binary logistic regression analysis, the diagnosis of liver cirrhosis (as defined by F-TE values) was the only independent predictor (OR 9.87, 95%CI 3.35-29.10,  $P < 0.001$ ) (Table S2). The results did not change with a LSM difference  $\geq 5$  and  $\geq 10$  kPa.

Table S2. Factors associated with a difference of  $\geq 2$  kPa between liver stiffness measured by F-TE and ElastPQ (Student's, Mann-Whitney and Chi-square tests used;  $p \leq 0.05$  represents the significance level).

|                                       | <u>Univariate</u>                  |                                        |         | <u>Multivariate</u> |            |         |
|---------------------------------------|------------------------------------|----------------------------------------|---------|---------------------|------------|---------|
|                                       | F-TE - ElastPQ liver < 2 kPa (119) | F-TE - ElastPQ liver $\geq 2$ kPa (33) | P value | OR                  | 95% CI     | P value |
| <b>PSC Mayo RS</b>                    | -0.46 (1.22)                       | 0.34 (1.49)                            | <0.001  | 1.28                | 0.73-2.27  | 0.392   |
| <b>MELD score</b>                     | 7 (3)                              | 7 (4)                                  | 0.611   |                     |            |         |
| <b>Small duct PSC, n/n (%)</b>        | 17/119 (14.3)                      | 2/33 (6.1)                             | 0.251   |                     |            |         |
| <b>Age, years</b>                     | 46 $\pm$ 16                        | 49 $\pm$ 16                            | 0.501   |                     |            |         |
| <b>Gender, female n/n (%)</b>         | 46/119 (39)                        | 13/33 (39)                             | 0.546   |                     |            |         |
| <b>Bilirubin (mg/dL)</b>              | 0.58 (1.0)                         | 0.94 (0.8)                             | 0.009   | 0.94                | 0.75-1.17  | 0.570   |
| <b>ALT (IU/L)</b>                     | 45 (73)                            | 78 (68)                                | <0.001  | 1                   | 0.99-1.01  | 0.507   |
| <b>AST (IU/L)</b>                     | 37 (55)                            | 67 (60)                                | <0.001  | 1                   | 0.99-1.01  | 0.507   |
| <b>ALP (IU/L)</b>                     | 145 (256)                          | 222 (193)                              | 0.147   |                     |            |         |
| <b>Platelets/mmc</b>                  | 255 (129)                          | 200 (142)                              | 0.023   | 0.99                | 0.98-1.01  | 0.625   |
| <b>Cirrhosis (F-TE = F4), n/n (%)</b> | 22/119 (18)                        | 25/33 (76)                             | <0.001  | 9.87                | 3.38-28.88 | <0.001  |

Numerical variables are expressed as median (IQR) or mean  $\pm$  SD according to distribution, dichotomous variables are expressed as n (%).

F-TE, liver transient elastography performed with FibroScan; kPa, kilopascal; OR, odd ratio; CI, confidence interval; PSC, primary sclerosing cholangitis; RS, risk score; MELD, model of end-stage liver disease; ALT, alanine aminotransferase; AST, aspartate aminotransferase; ALP, alkaline phosphatase; IQR, interquartile range; SD, standard deviation.

The factors potentially associated with the presence of OVs were investigated in the subgroup of 35 patients who underwent an UGIE within 12 months from the date of the elastographic assessment. Eighteen patients had OVs, with only two patients having varices at high-risk of bleeding (HRVs). The differences in clinical, biochemical and elastographic parameters between the groups of patients with and without OVs are shown in Table S3. In particular, median values of F-TE, ElastPQ LSM, ElastPQ SSM and LSPS were significantly higher in patients with OVs compared to those without ( $p < 0.001$ ).

Table S3. Comparison between patients with and patients without oesophageal varices (Mann-Whitney and Chi-square tests used;  $p \leq 0.05$  represents the significance level).

|                                    | No OVs       | OVs        | P value |
|------------------------------------|--------------|------------|---------|
| <b>PSC Mayo RS</b>                 | -0.27 (1.43) | 1.06 (1.5) | <0.001  |
| <b>Child-Pugh score</b>            | 5.0 (0)      | 7 (3)      | <0.001  |
| <b>MELD score</b>                  | 7.01 (3)     | 12.46 (7)  | <0.001  |
| <b>Spleen area, cm<sup>2</sup></b> | 55 (56)      | 87 (55)    | 0.040   |
| <b>Spleen LD, cm</b>               | 12 (4.4)     | 16 (4.3)   | 0.007   |
| <b>Bilirubin mg/dL</b>             | 0.9 (1.2)    | 3.0 (5.5)  | <0.001  |
| <b>AST (IU/L)</b>                  | 70 (60)      | 81 (71)    | 0.045   |
| <b>ALP (IU/L)</b>                  | 256 (292)    | 210 (243)  | 0.566   |

|                                 |             |             |        |
|---------------------------------|-------------|-------------|--------|
| <b>Platelets/mm<sup>3</sup></b> | 254 (483)   | 102 (138)   | 0.001  |
| <b>Albumin g/dL</b>             | 4.3 (0.6)   | 3.4 (0.9)   | 0.001  |
| <b>INR</b>                      | 1 (0.1)     | 1.2 (0.8)   | <0.001 |
| <b>F-TE LSM, kPa</b>            | 12 (22.2)   | 46.5 (44.5) | <0.001 |
| <b>ElastPQ LSM, kPa</b>         | 12 (14.1)   | 39.8 (28)   | <0.001 |
| <b>ElastPQ SSM, kPa</b>         | 31.6 (14.1) | 51.8 (26.5) | <0.001 |
| <b>LSPS</b>                     | 0.61 (2.1)  | 6.3 (12.6)  | <0.001 |

*Values are expressed as median (IQR) or mean  $\pm$  SD, according to distribution.*

*OVs, oesophageal varices; PSC, primary sclerosing cholangitis; RS, risk score; MELD, model of end-stage liver disease; LD, longitudinal diameter; ALT, alanine aminotransferase; AST, aspartate aminotransferase; ALP, alkaline phosphatase; INR, international normalized ratio; F-TE, liver transient elastography performed with FibroScan; kPa, kilopascal; LSM, liver stiffness measurement; SSM, spleen stiffness measurement.; LSPS, liver stiffness  $\times$  platelet count to spleen length ratio.*

ElastPQ SSM was the only independent predictor of the presence of OV<sub>s</sub> on multivariate analysis (OR 1.14; CI 1.02-1.27; p=0.021), regardless of whether the Mayo risk score, MELD or Child-Pugh score was included in the model as indicator of liver disease severity (Figure S1).

Figure S1. Violin Plots. Difference in the median values of ElastPQ spleen stiffness between patients with and without oesophageal varices. Black squares represent the mean value; black bars represent the median value; the upper and lower edges of the boxes represent the interquartile range. The gray dots represent the members of the population. The thin gray lines represent the rest of the distribution, except for points that are determined to be outliers. On each side of the gray line is a kernel density estimation to show the distribution shape of the data. Wider sections of the violin plot represent a higher probability that members of the population will take on the given value; the skinnier sections represent a lower probability (Mann-Whitney test used; p-value  $\leq 0.05$  represents the significance level).

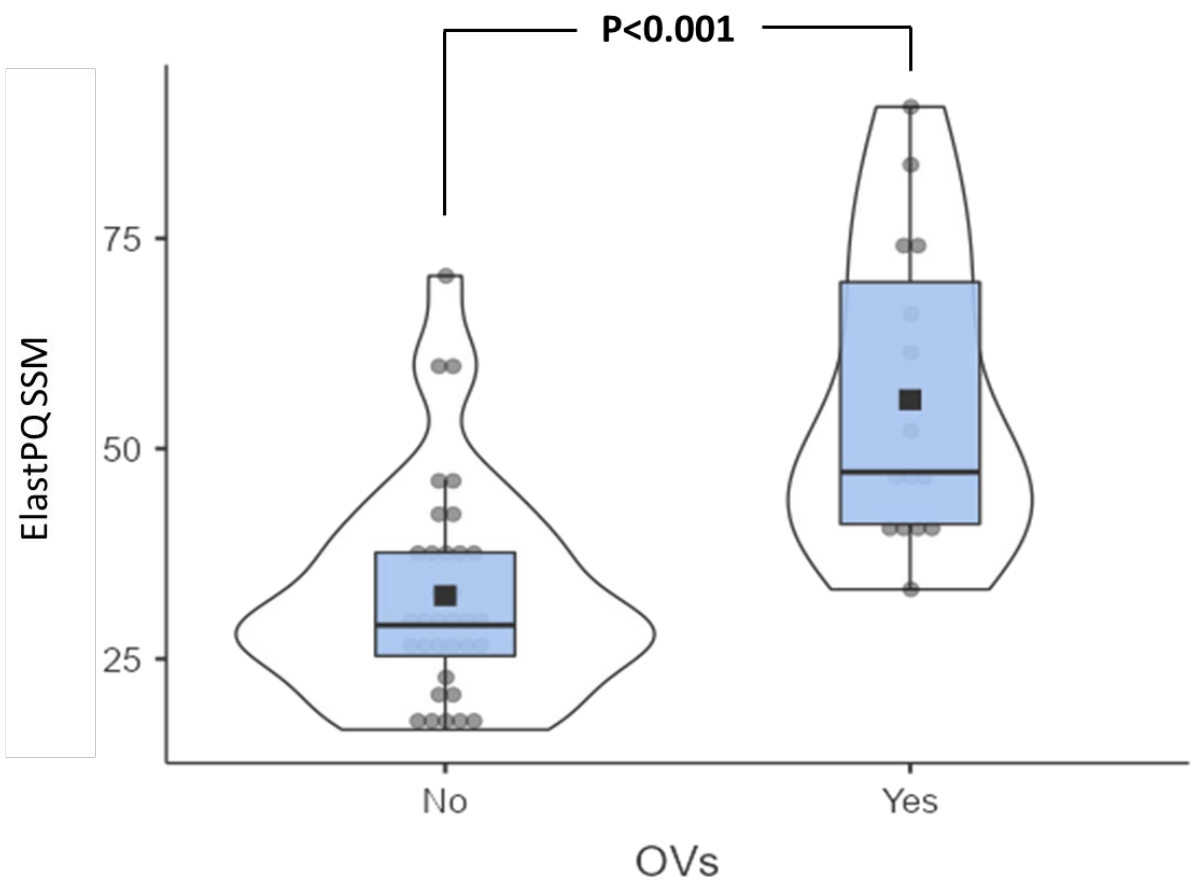

*SSM, spleen stiffness measurement; OVs, oesophageal varices*
